# Supplementary material
Source: PubMed Central journal article supplement (PMC8358727)

# Figure S1

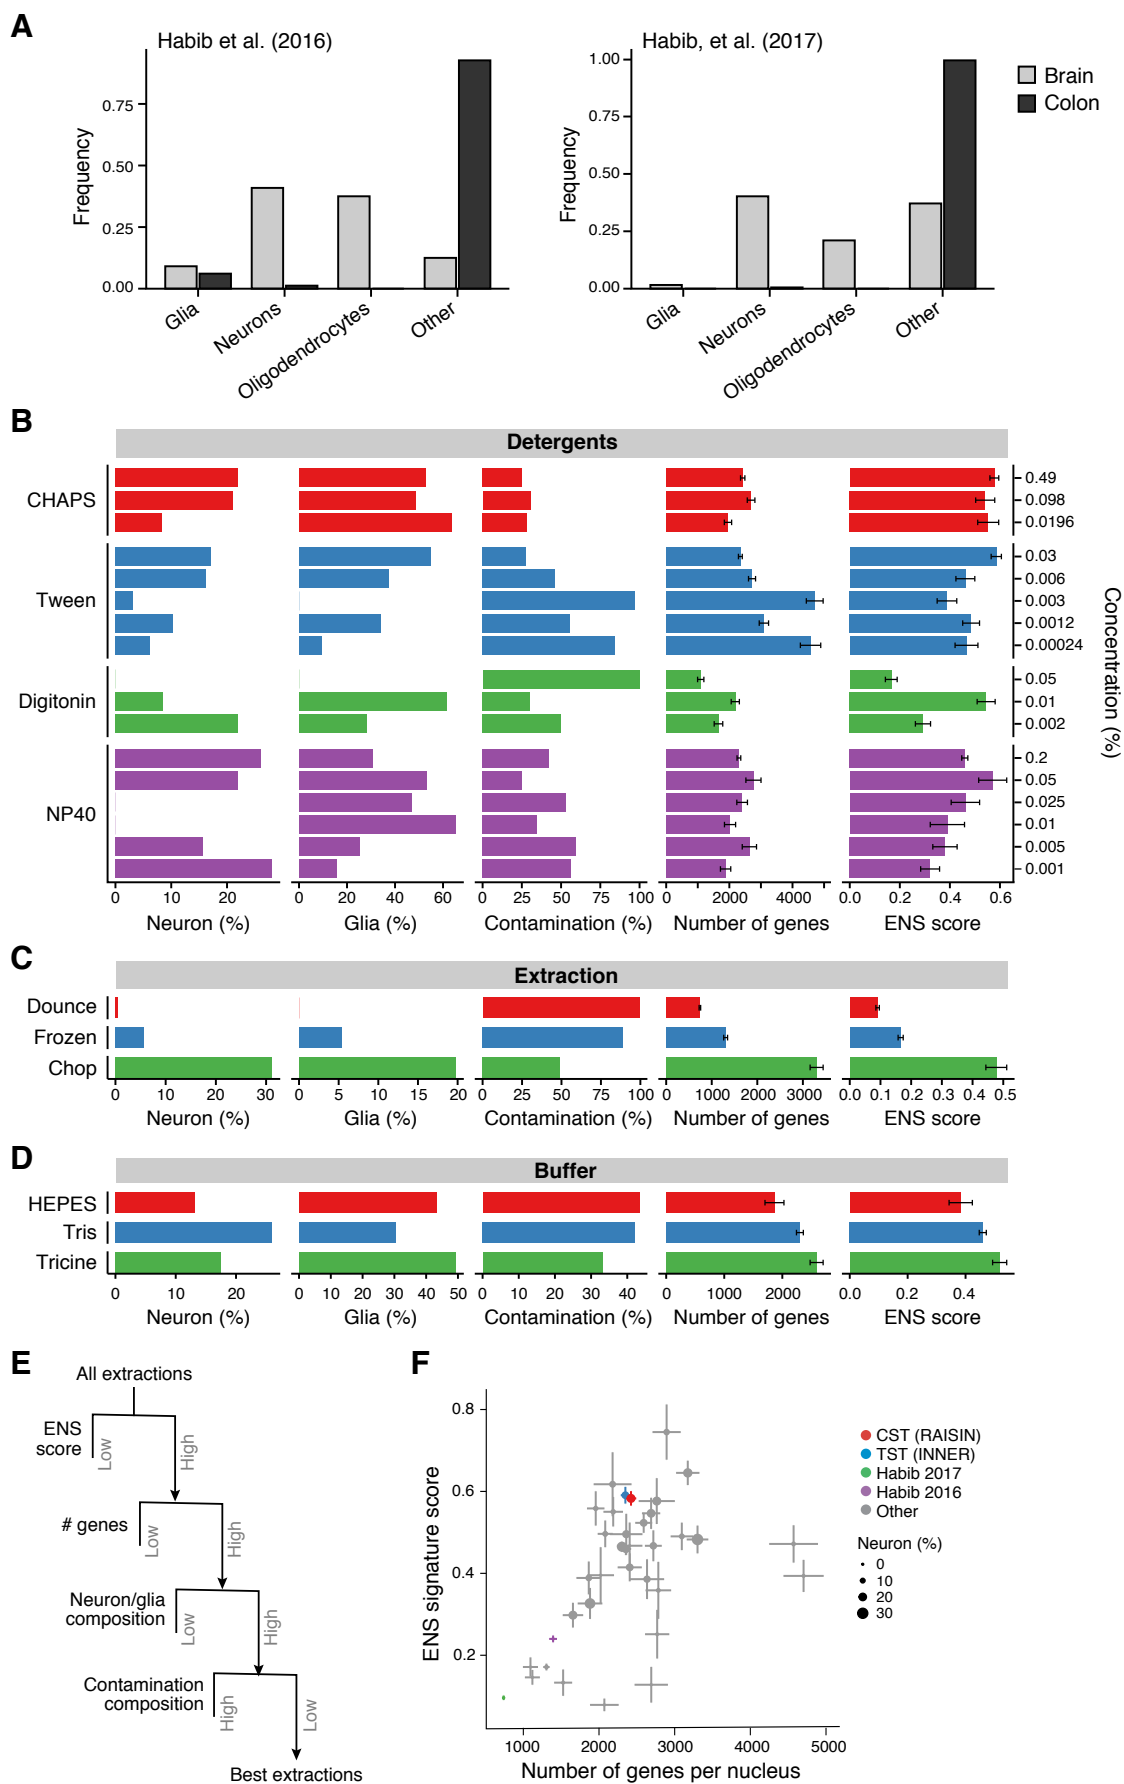

Supplement: NIHMS1728589-supplement-Figure_S1.pdf [file NIHMS1728589-supplement-Figure_S1.pdf]

Figure S2

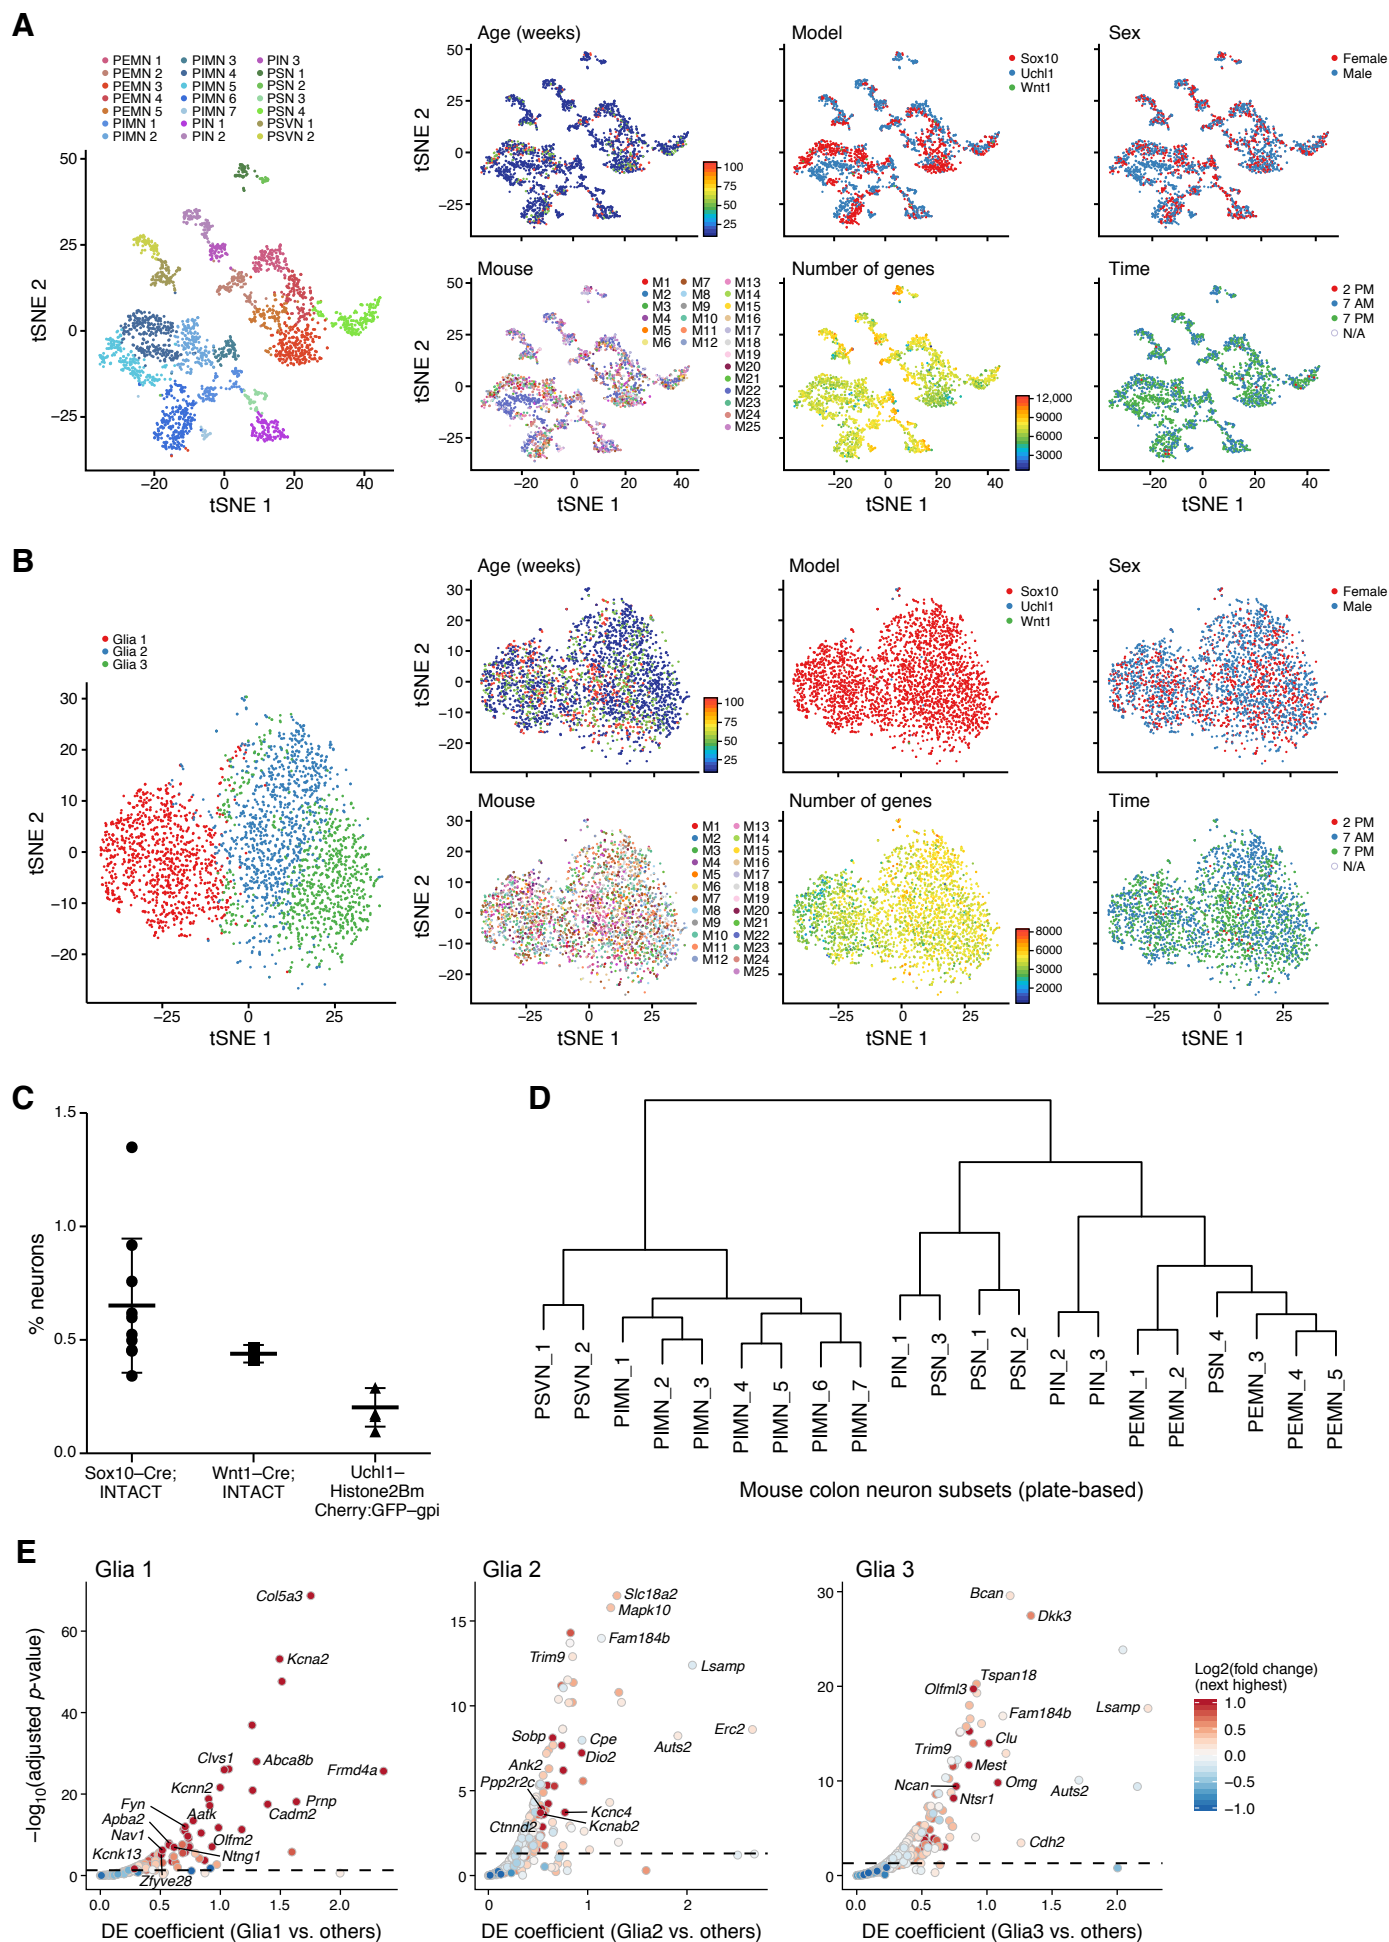

Supplement: NIHMS1728589-supplement-Figure_S2.pdf [file NIHMS1728589-supplement-Figure_S2.pdf]

# Figure S3

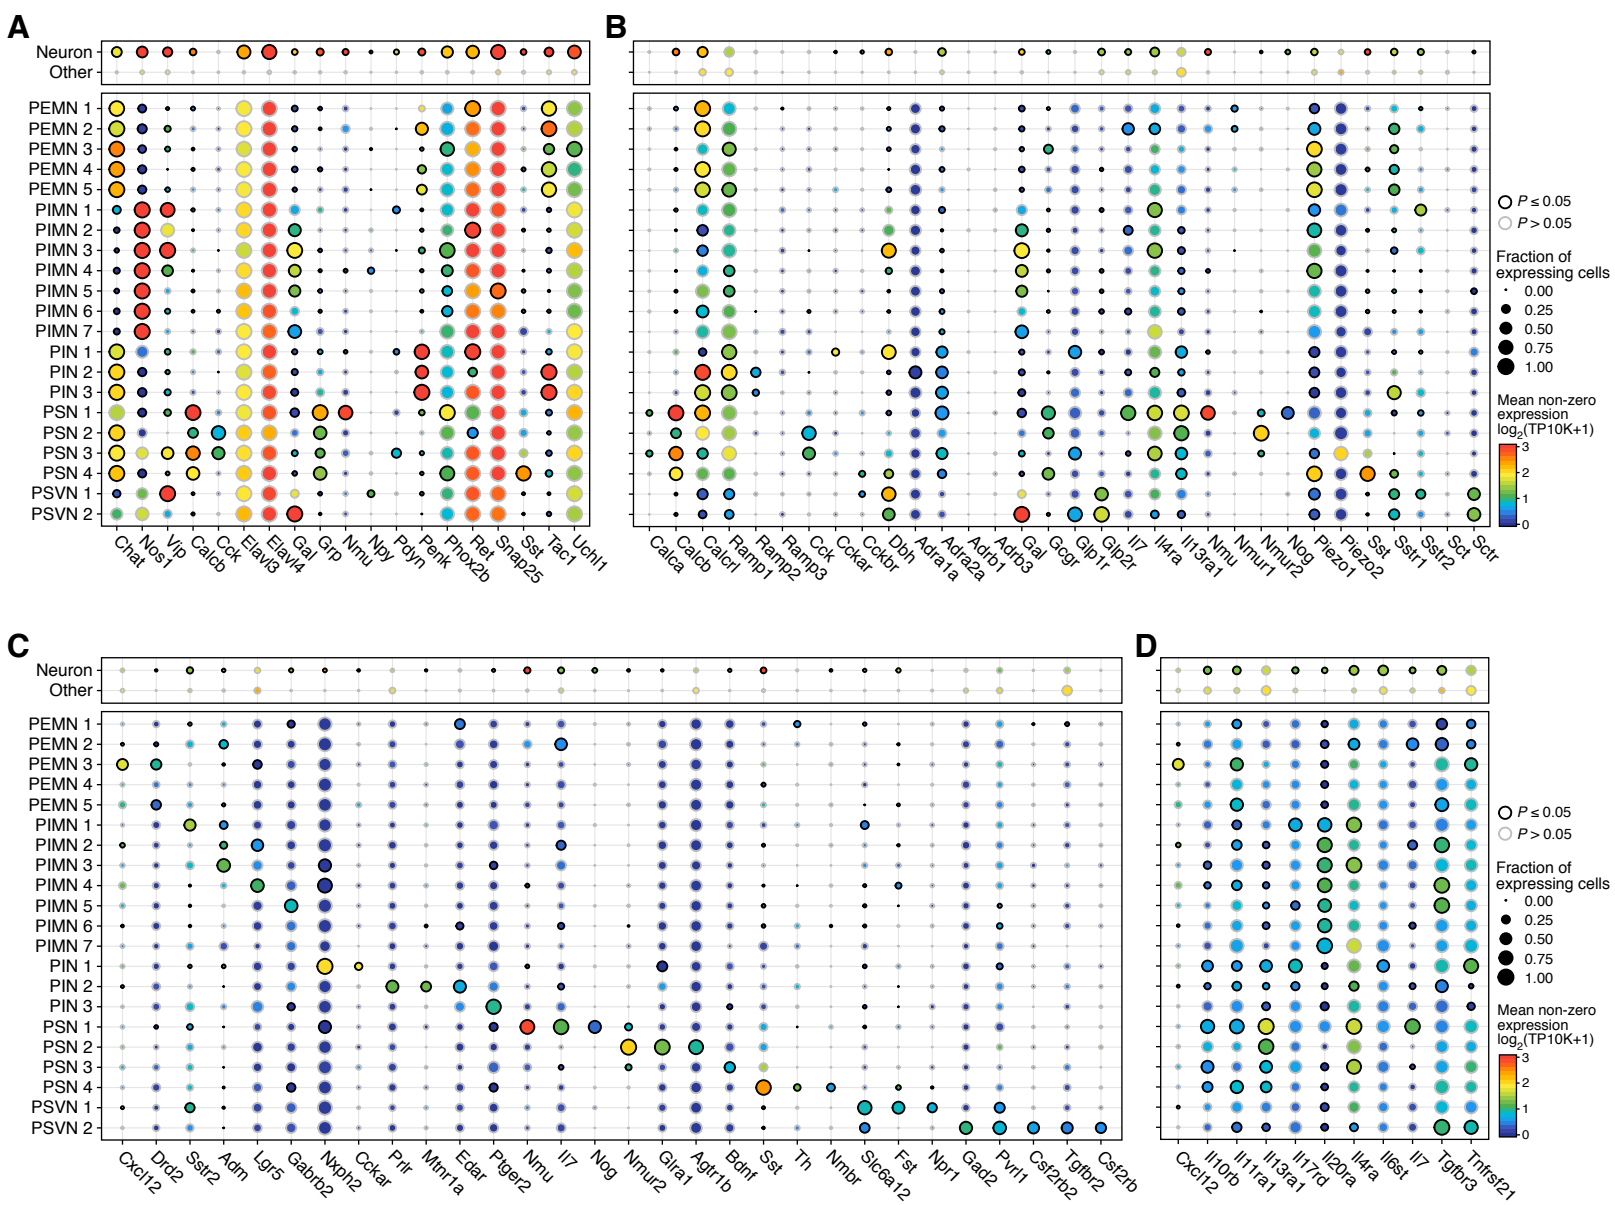

Supplement: NIHMS1728589-supplement-Figure_S3.pdf [file NIHMS1728589-supplement-Figure_S3.pdf]

Figure S4

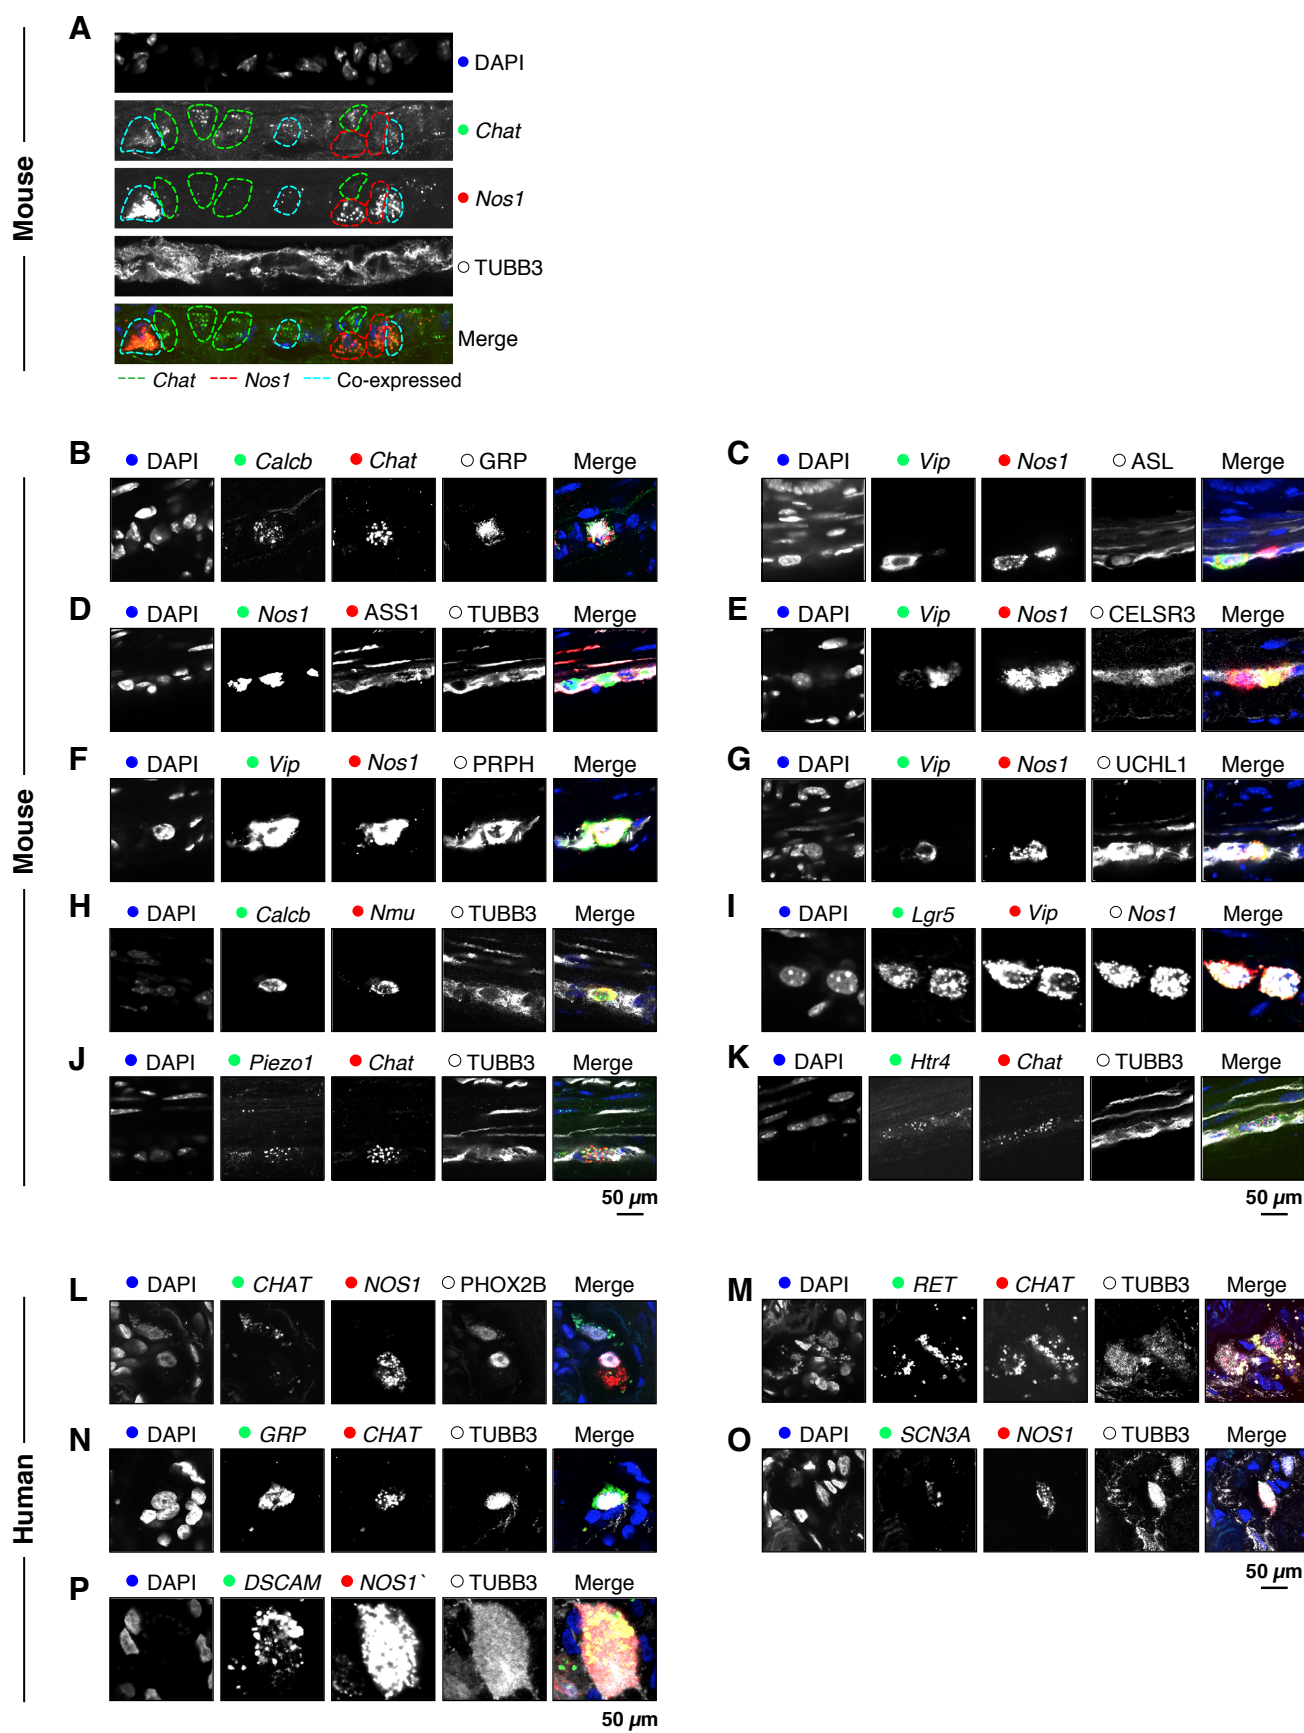

Supplement: NIHMS1728589-supplement-Figure_S4.pdf [file NIHMS1728589-supplement-Figure_S4.pdf]

Figure S5

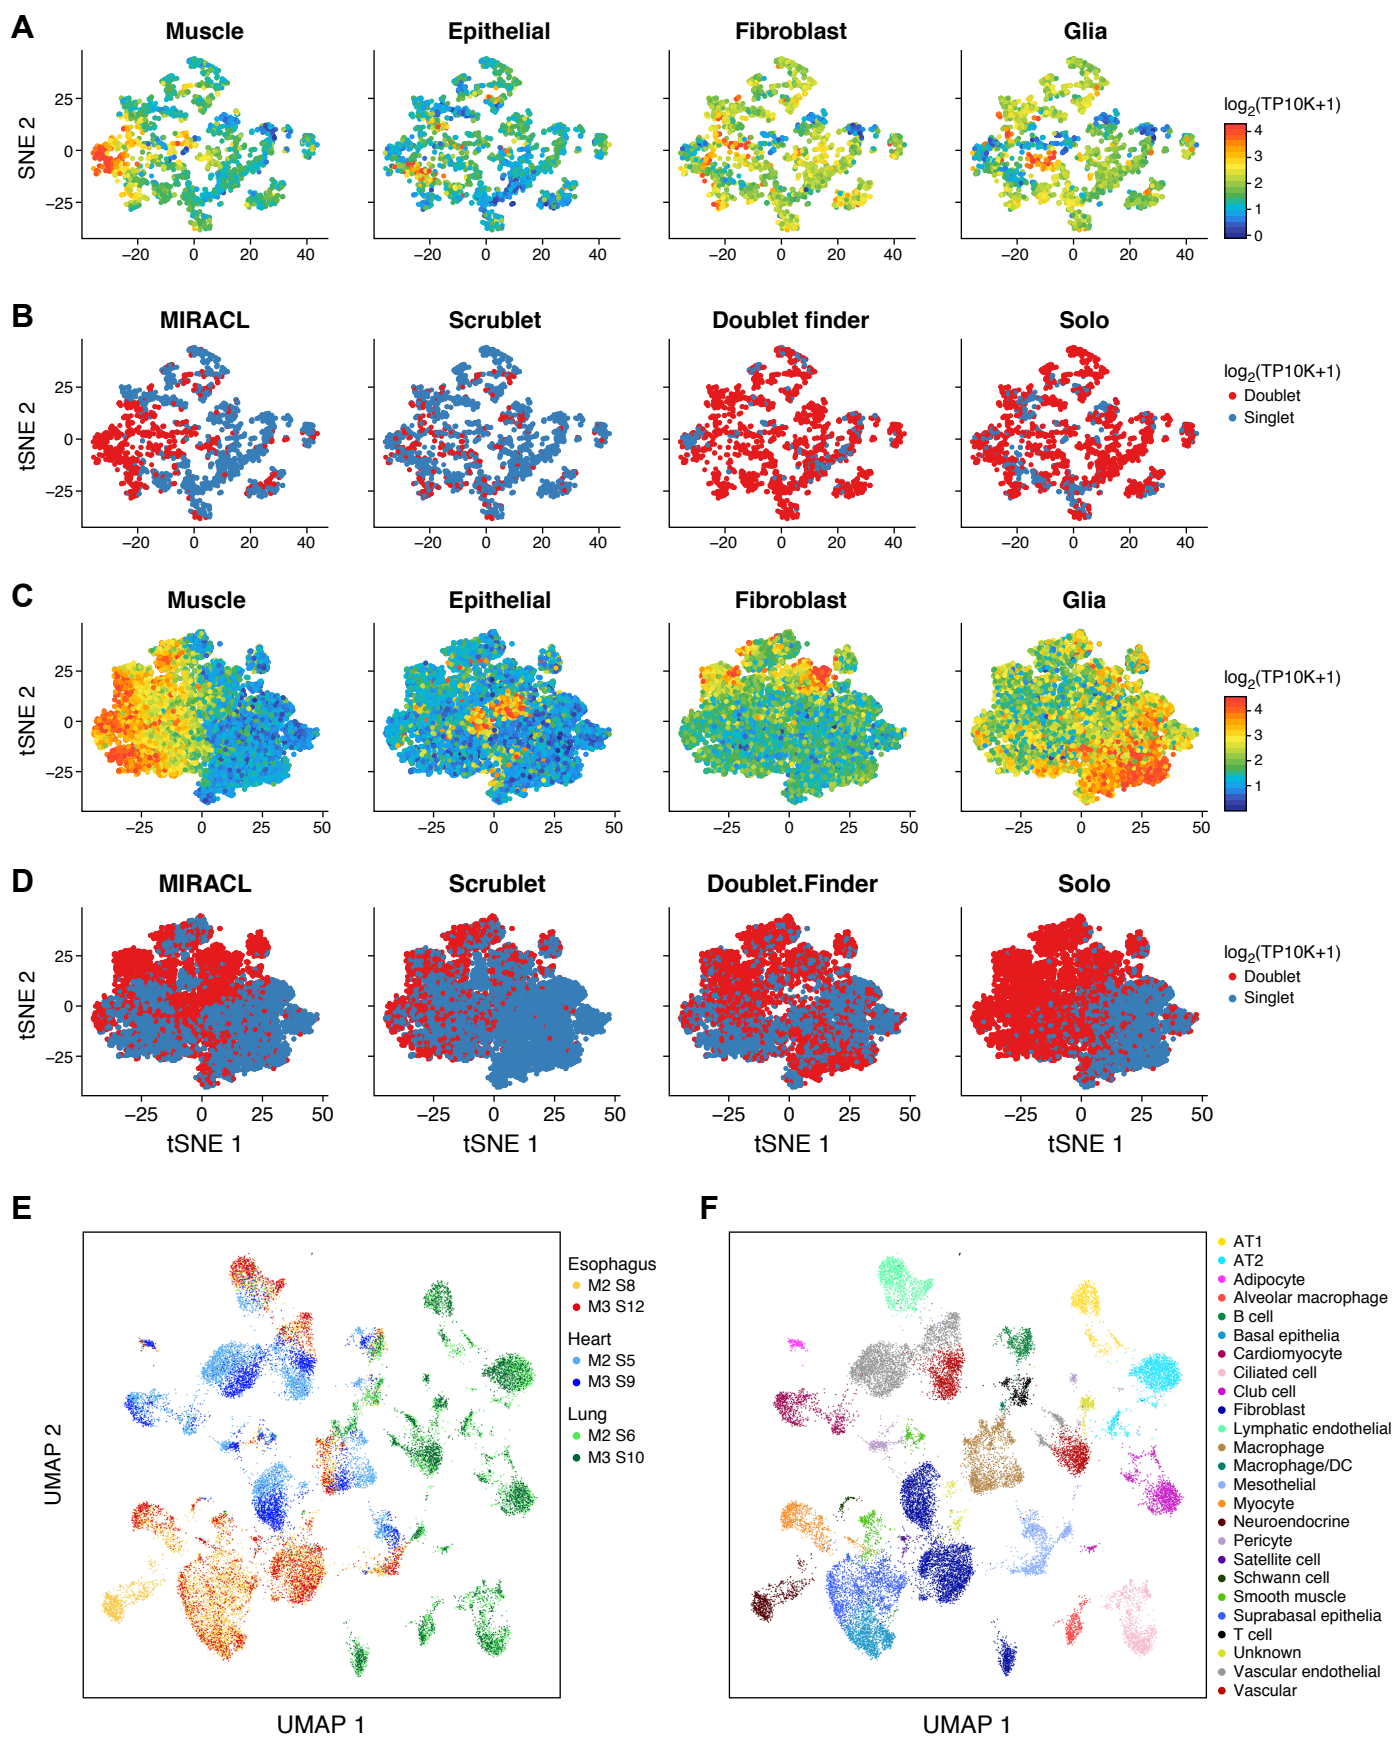

Supplement: NIHMS1728589-supplement-Figure_S5.pdf [file NIHMS1728589-supplement-Figure_S5.pdf]

Figure S6

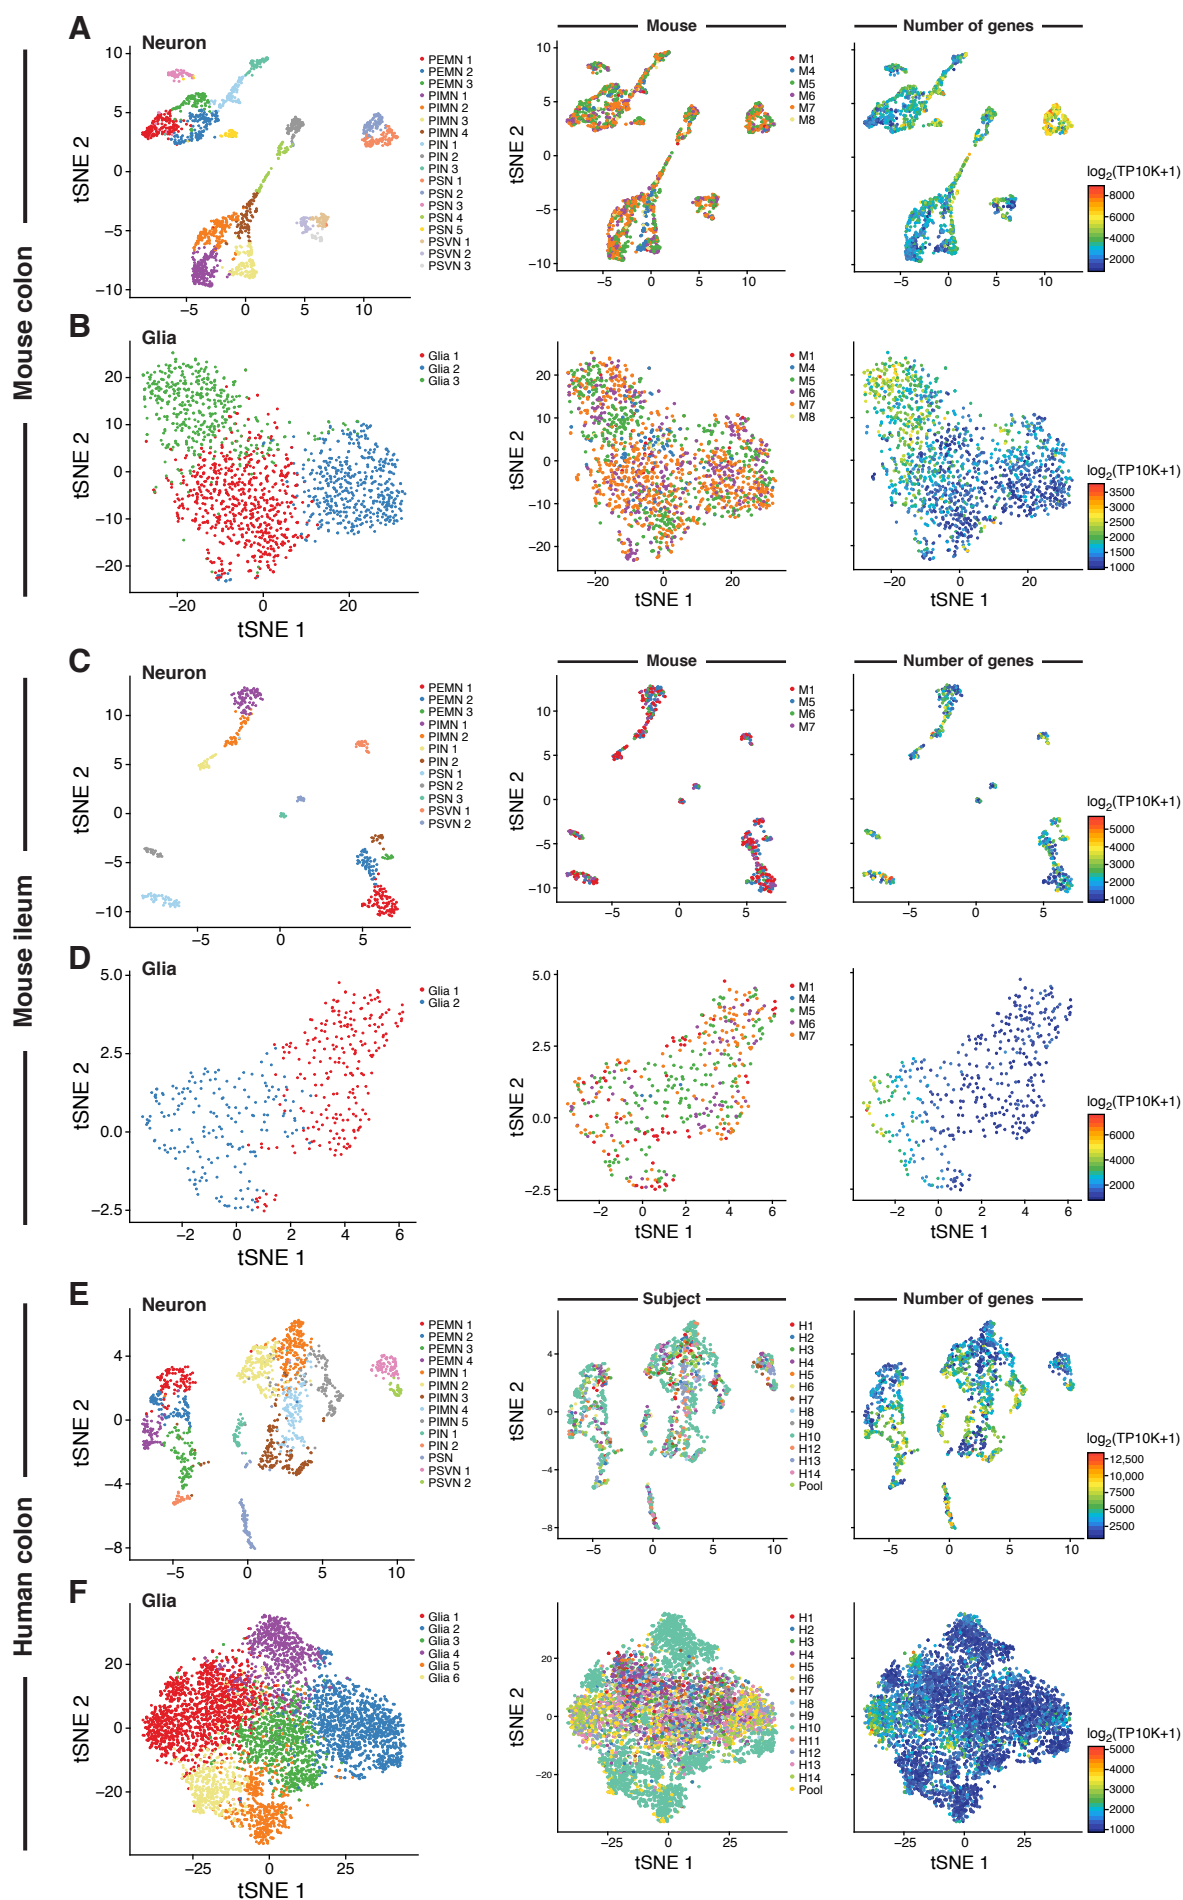

Supplement: NIHMS1728589-supplement-Figure_S6.pdf [file NIHMS1728589-supplement-Figure_S6.pdf]

Figure S7

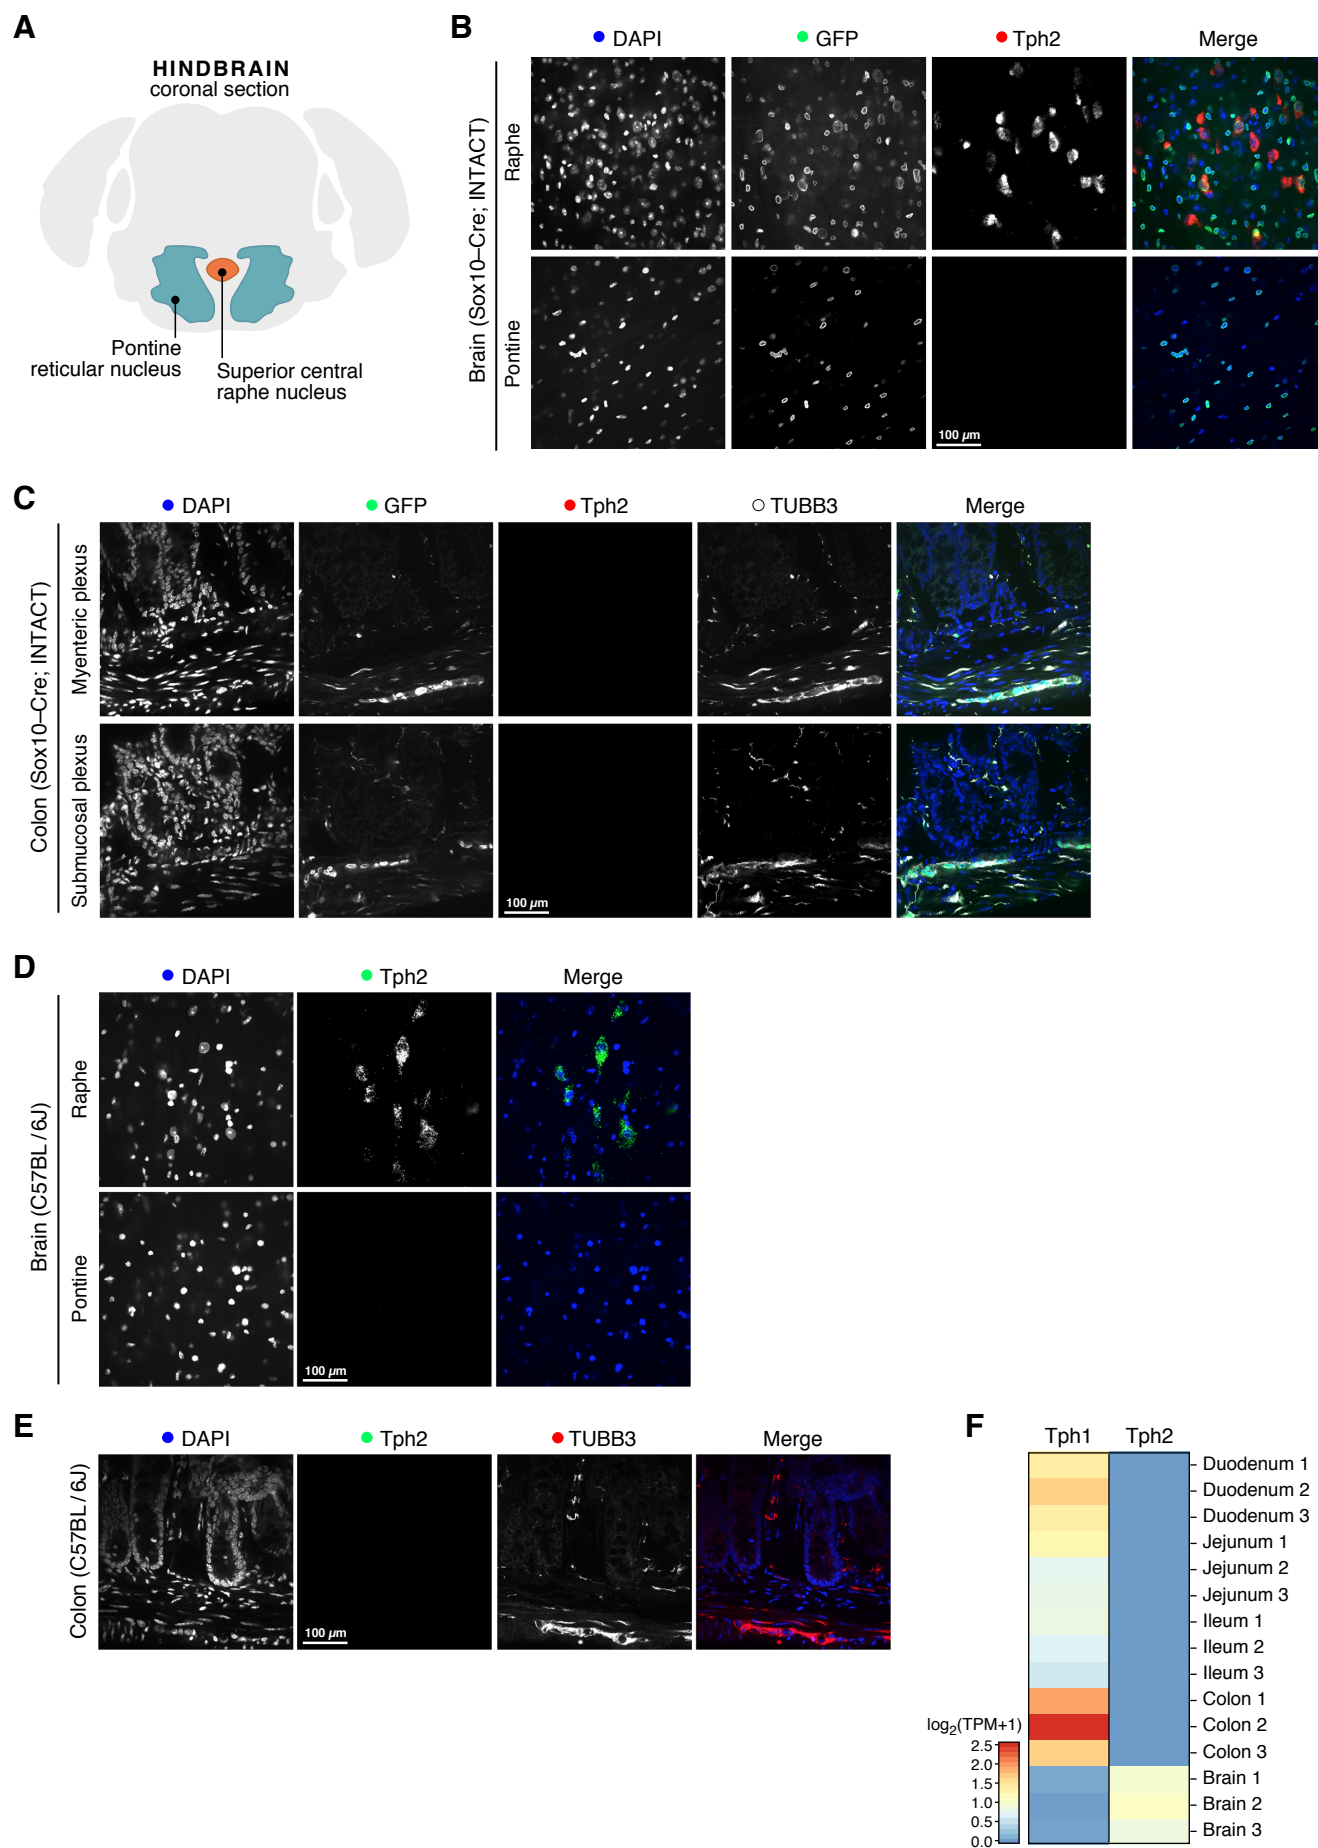

Supplement: NIHMS1728589-supplement-Figure_S7.pdf [file NIHMS1728589-supplement-Figure_S7.pdf]
